# Supplementary material for: Assessment and Documentation of Indigenous and Introduced Soil and Water Conservation Measures in Some Parts of Southern Ethiopia
Source: Research Square preprint supplement (doi:10.21203/rs.3.rs-138860/v1), 2021-01-05
Supplement: Supplementary file 1 [file c45141ed33ac371bd1d4b480.docx]

**Appendix**

| Name of structures | Description | Study area | Type | Remark |
| --- | --- | --- | --- | --- |
| Soil bund (level and graded) | Introduced | Wolaita, Hadiya, K/Tambaro and Dawro | Physical |  |
| Bund (traditional bund) | Indigenous | Dawro | Physical | Farmers leave 0.5 – 1m size plot of land across slope at some distance interval on cropped land |
| Stone bund (level and graded) | Introduced and Indigenous | Wolaita, Hadiya, K/Tambaro and Dawro | Physical | Based on stone availability |
| Stone faced soil bund | Introduced | Wolaita and Hadiya | Physical |  |
| Fanya juu | Introduced | Dawro, Wolaita, K/Tambaro, | Physical |  |
| Bench terrace | Introduced | Dawro, Wolaita, K/Tambaro, Hadiya | Physical |  |
| Check dams/brushwood,  stone, sand bag and gabion | Introduced | Dawro, Wolaita, Hadiya, K/Tambaro | Physical |  |
| Area closure | Introduced | Wolita, K/Tambaro, Dawro and Hadiya | Biological | In combination with physical SWC practices |
| Cutoff drain | Introduced and Indigenous | Wolaita, Hadiya, K/Tambaro and Dawro | Physical |  |
| Trench | Introduced | Dawro, Wolaita, K/Tambaro, Hadiya | Physical |  |
| Micro basin | Introduced | Dawro, Wolaiata, K/Tambaro, | Physical |  |
| Grass strip | Introduced | Dawro, Wolaita, Hadiya, K/Tambaro, | Biological | Desh, elephant grass |
| Bund stablizer | Introduced | Dawro, Wolaita, Hadiya, K/Tambaro, | Biological | Banana, desho, elephant grass, pigeon pea |
| Cotour furrow/*shilshalo* | Indigenous | Dawro, Wolaita | Agronomic | Practices commonly on maize field |
| Contour farming | Indigenous | Dawro, Wolaita, K/Tambaro, Hadiya | Agronomic |  |
| Live fencing | Indigenous | Dawro, Hadiya | Biological | *Jatropha* curcus, |
| Improved fallowing | Indigenous | Dawro, Wolaita, Hadiya | Agronomic |  |
| Mulching and crop residue management | Indigenous | Dawro, Wolaita, K/Tambaro, | Agronomic | maize and sorghum residues, cutting the stalk of wheat, teff and barley from top 15-20 cm, animal dung, leaving banana leaf, |
| Intercropping | Indigenous | Dawro, Wolaita, K/Tambaro, Hadiya | Agronomic | Maize + Field pea, Enset + Coffee, Maize + Common bean |
| Crop rotation | Indigenous | Dawro, Wolaita, K/Tambaro, Hadiya | Agronomic | Cereal with legumes |
| Pond | Introduced | Hadiya, K/Tambaro, Wolaita, Dawro | Physical | to irrigate vegetable crops and use as water source for livestock |
| Tree plantation across slope, gully and in crop lands | Indigenous | Dawro, Wolaita, Hadiya, K/Tambaro | Biological | *Jatropha* *Curucs*, *Erytrinica*, *Mangifera Indica, Terminalia browni, Persia americana, Musa, Enset Ventricusem, “Sisal”, Oxytenanthera abyssinica, Arundinaria alpina, Gravellia robusta, cassava, Moringa stenoptalea, A.Saligna, A.decurrence,* |
| FYM | Indigenous | Dawro, | Agrononmic |  |
| Row planting | Indigenous | Dawro, Wolaita | Agronomic |  |
| Compost | Indigenous | Dawro, K/Tambaro | Agronomic |  |
| Tie ridge | Introduced | Dawro, Wolaita, K/Tambaro, Hadiya | Physical |  |
| Controlled and Zero grazing | Indigenous and Introduced | Dawro, K/Tambaro, Hadiya | Agronomic |  |
| Water way | Natural and Artificial | Wolaita, Dawro, Hadiya | Physical |  |
| Hillside terrace | Introduced | Wolaita, K/Tambaro, Dawro, Hadiya | Physical |  |
| Hand-dug wells | Introduced | K/Tambaro, Dawro | Physical |  |
